# Supplementary material for: Chemical Profile of the Volatile Constituents and Antimicrobial Activity of the Essential Oils from Croton adipatus, Croton thurifer, and Croton collinus
Source: MDPI journal article supplement (doi:10.3390/antibiotics10111387), 2021-11-12
Supplement: s1 [file s1]

## Supplementary material

# Chemical Profile of the Volatile Constituents and Antimicrobial Activity of the Essential Oils from *Croton adipatus*, *Croton thurifer*, and *Croton collinus*

Juana Liz Cucho-Medrano <sup>1</sup>, Sammy Wesley Mendoza-Beingolea <sup>1</sup>, César Máximo Fuertes-Ruitón <sup>2</sup>, María Elena Salazar-Salvatierra <sup>3</sup>, and Oscar Herrera-Calderón <sup>4,\*</sup>

<sup>1</sup> Faculty of Pharmacy and Biochemistry, Universidad Nacional Mayor de San Marcos, Jr. Puno 1002, Lima 15001, Peru; [liz.cumed@gmail.com](mailto:liz.cumed@gmail.com) (J.L.C.-M.), [sammy\\_w20@outlook.com](mailto:sammy_w20@outlook.com) (S.W.M.-B.)

<sup>2</sup> Institute for Research in Pharmaceutical Sciences and Natural Resources, Faculty of Pharmacy and Biochemistry, Universidad Nacional Mayor de San Marcos, Jr. Puno 1002, Lima 15001, Peru; [cfuertesr@unmsm.edu.pe](mailto:cfuertesr@unmsm.edu.pe)

<sup>3</sup> Research Institute in Biological Chemistry, Microbiology and Biotechnology, Faculty of Pharmacy and Biochemistry, Universidad Nacional Mayor de San Marcos, Jr. Puno 1002, Lima 15001, Peru; [msalazars@unmsm.edu.pe](mailto:msalazars@unmsm.edu.pe)

<sup>4</sup> Department of Pharmacology, Bromatology and Toxicology, Faculty of Pharmacy and Biochemistry, Universidad Nacional Mayor de San Marcos, Jr. Puno 1002, Lima 15001, Peru. [oherreraca@unmsm.edu.pe](mailto:oherreraca@unmsm.edu.pe)

\* Correspondence: [oherreraca@unmsm.edu.pe](mailto:oherreraca@unmsm.edu.pe); Tel.: (+51-956-550-510)

| Supplementary material                                                                                                                                                                 | Pag. |
|----------------------------------------------------------------------------------------------------------------------------------------------------------------------------------------|------|
| Figure S1. GC-MS chromatogram of the essential oil of <i>Croton adipatus</i> Kunth.                                                                                                    | 3    |
| Figure S2. Spectrum of the main constituents of the essential oil of <i>Croton adipatus</i> Kunth. A: $\beta$ -myrcene; B: $\alpha$ -thujene; C: D-Limonene.                           | 3    |
| Figure S3. GC-MS chromatogram of the essential oil of <i>Croton thurifer</i> Kunth.                                                                                                    | 3    |
| Figure S4. Spectrum of the main constituents of the essential oil of <i>Croton thurifer</i> Kunth. A: Unknown ( $C_{10}H_{16}$ ); B: Unknown ( $C_{15}H_{26}O$ ); C: $\beta$ -elemene. | 4    |
| Figure S5. GC-MS chromatogram of the essential oil of <i>Croton collinus</i> Kunth.                                                                                                    | 4    |
| Figure S6. Spectrum of the main constituents of the essential oil of <i>Croton collinus</i> Kunth. A: $\beta$ -caryophyllene B: D-limonene; C: $\beta$ -thujene.                       | 4    |
| Table S1. Physicochemical properties of the essential oils of <i>Croton</i> species.                                                                                                   | 5    |
| Table S2. Retention times of the chemical compounds of <i>Croton adipatus</i> Kunth essential oil.                                                                                     | 6    |

|                                                                                                                                                                                                                                                                      |           |
|----------------------------------------------------------------------------------------------------------------------------------------------------------------------------------------------------------------------------------------------------------------------|-----------|
| <b>Table S3. Retention times of the chemical compounds of <i>Croton thurifer</i> Kunth essential oil.</b>                                                                                                                                                            | <b>8</b>  |
| <b>Table S4 Retention times of the chemical compounds of <i>Croton collinus</i> Kunth essential oil.</b>                                                                                                                                                             | <b>9</b>  |
| <b>Figure S7. Determination of the Minimum Inhibitory Concentration of the standard drugs. SC (Sterility Control), GC (Growth Control), Sa (<i>S. aureus</i>), Bs (<i>B. subtilis</i>), Ec (<i>E. coli</i>), Pa (<i>P. aeruginosa</i>), Ca (<i>C. albicans</i>).</b> | <b>10</b> |

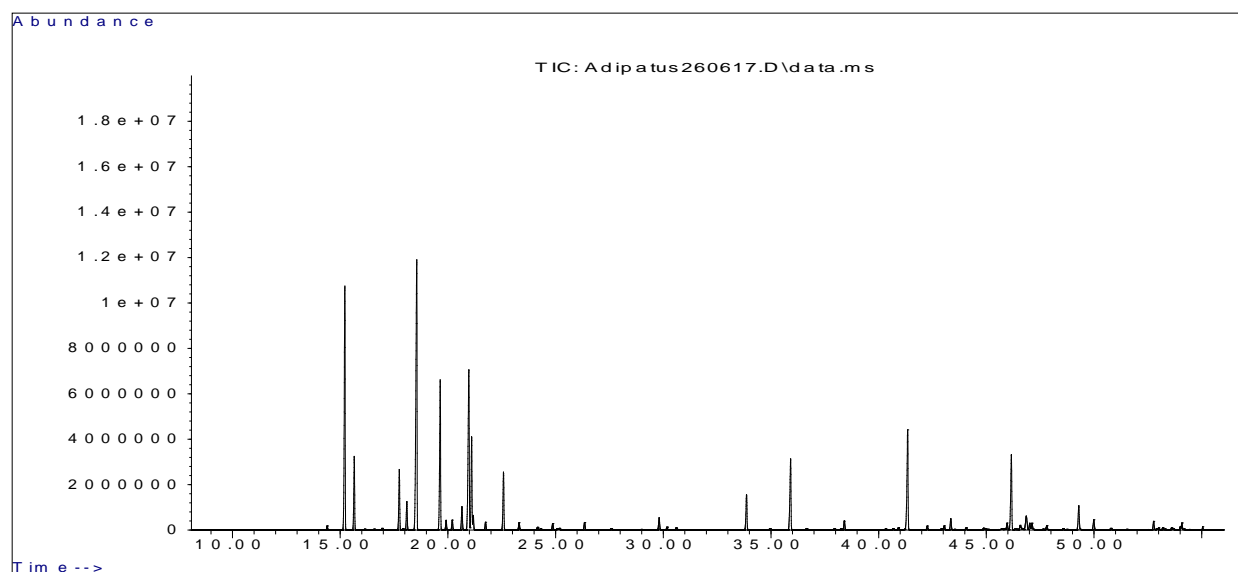

Figure S1. GC-MS chromatogram of the essential oil of *Croton adipatus* Kunth.

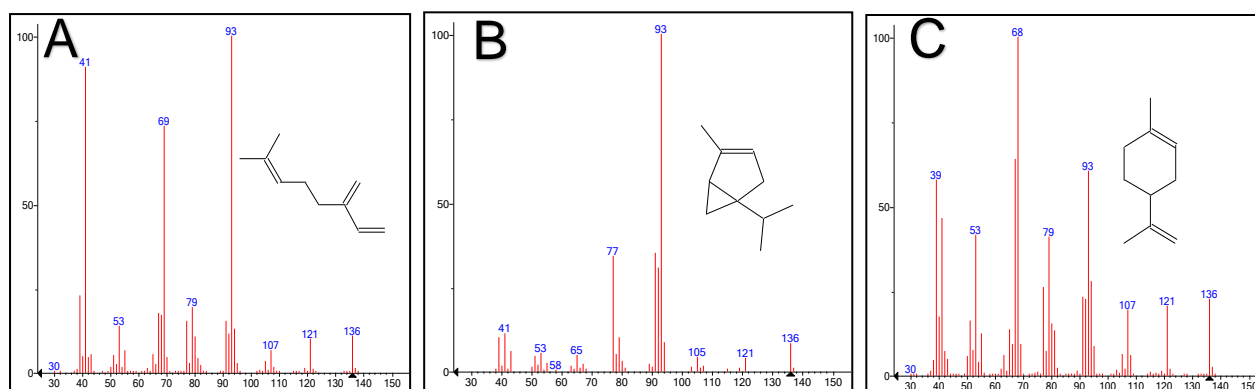

Figure S2. Spectrum of the main constituents of the essential oil of *Croton adipatus* Kunth.  
A:  $\beta$ -myrcene; B:  $\alpha$ -thujene; C: D-Limonene.

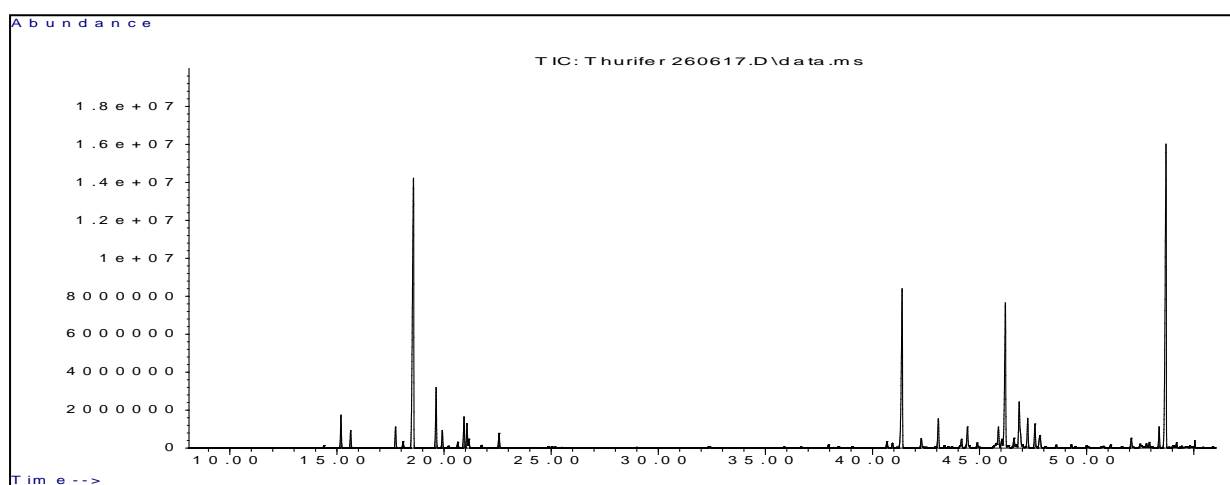

Figure S3. GC-MS chromatogram of the essential oil of *Croton thurifer* Kunth.

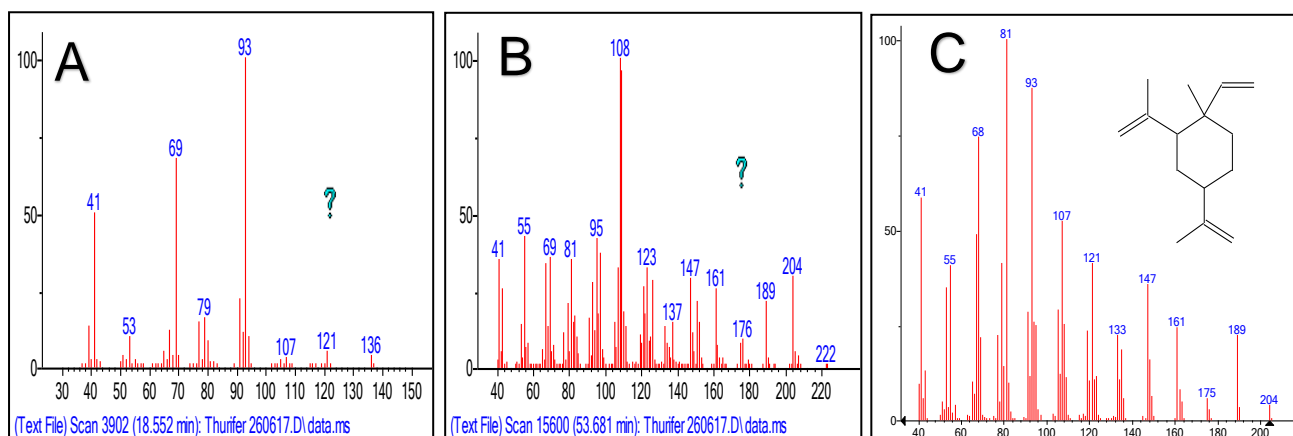

**Figure S4. Spectrum of the main constituents of the essential oil of *Croton thurifer* Kunth.**  
**A: Unknown ( $C_{10}H_{16}$ ); B: Unknown ( $C_{15}H_{26}O$ ); C:  $\beta$ -elemene.**

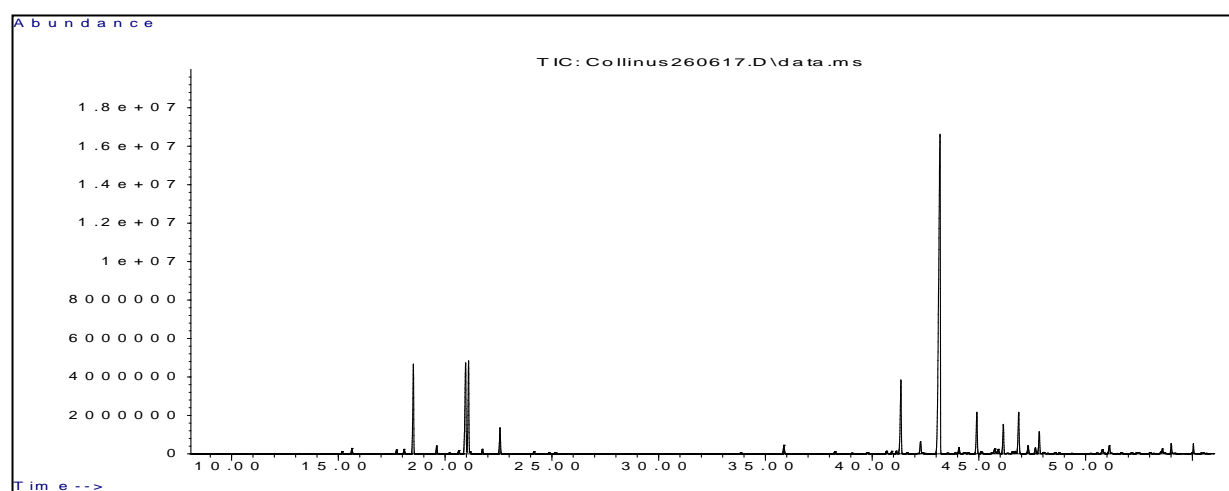

**Figure S5. GC-MS chromatogram of the essential oil of *Croton collinus* Kunth.**

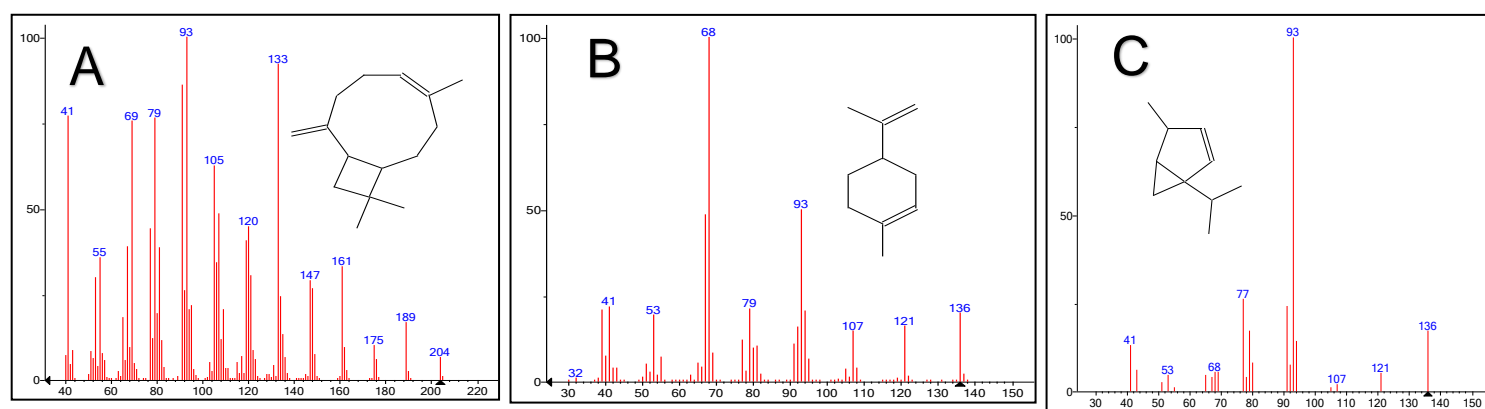

**Figure S6. Spectrum of the main constituents of the essential oil of *Croton collinus* Kunth.**  
**A:  $\beta$ -caryophyllene B: D-limonene; C:  $\beta$ -thujene.**

**Table S1. Physicochemical properties of the essential oils of Croton species.**

|                                | <i>Croton adipatus</i><br>Kunth                                                     | <i>Croton thurifer</i><br>Kunth                                                      | <i>Croton collinus</i><br>Kunth                                                      |
|--------------------------------|-------------------------------------------------------------------------------------|--------------------------------------------------------------------------------------|--------------------------------------------------------------------------------------|
| <b>Solubility</b>              | Insoluble in water and ethanol 50%, soluble in methanol, DMSO and absolute ethanol. | Insoluble in water and ethanol 50 %, soluble in methanol, DMSO and absolute ethanol. | Insoluble in water and ethanol 50 %, soluble in methanol, DMSO and absolute ethanol. |
| <b>Density (25°C)</b>          | 0.9064 g/mL                                                                         | 0.9371 g/mL                                                                          | 0.9117 g/mL                                                                          |
| <b>Refractive index (20°C)</b> | 1.4715                                                                              | 1.4800                                                                               | 1.4845                                                                               |
| <b>Yield (%)</b>               | 0.47± 0.01                                                                          | 0.07± 0.005                                                                          | 0.06 ± 0.001                                                                         |

**Table S2. Chemical composition of *Croton adipatus* Kunth essential oil.**

| N° | Chemical constituents                       | Rt (min) |
|----|---------------------------------------------|----------|
| 1  | Isobutyl isobutyrate                        | 14.39    |
| 2  | $\alpha$ -thujene                           | 15.22    |
| 3  | $\alpha$ -Pinene                            | 15.65    |
| 4  | Sabinene                                    | 17.74    |
| 5  | $\beta$ -Pinene                             | 18.09    |
| 6  | $\beta$ -Myrcene                            | 18.55    |
| 7  | $\alpha$ -Phellandrene                      | 19.65    |
| 8  | Isoamyl isobutyrate                         | 19.92    |
| 9  | $\alpha$ -Terpinene                         | 20.20    |
| 10 | o-Cymene                                    | 20.65    |
| 11 | D-Limonene                                  | 20.97    |
| 12 | $\beta$ -Phellandrene                       | 21.11    |
| 13 | Eucalyptol                                  | 21.18    |
| 14 | cis-Ocimene                                 | 21.75    |
| 15 | $\tau$ -Terpinene                           | 22.58    |
| 16 | $\beta$ -Terpineol                          | 23.31    |
| 17 | Terpinolene                                 | 24.16    |
| 18 | $\beta$ -Linalool                           | 24.87    |
| 19 | 1,6-Dimethylhepta-1,3,5-triene              | 26.35    |
| 20 | 4-Terpineol                                 | 29.81    |
| 21 | 2-Decanone                                  | 30.17    |
| 22 | $\alpha$ -Terpineol                         | 30.60    |
| 23 | 2-Undecanone                                | 33.87    |
| 24 | 2-Dodecanone                                | 35.91    |
| 25 | 2-Carene                                    | 38.41    |
| 26 | Unknown (C <sub>15</sub> H <sub>24</sub> )  | 40.92    |
| 27 | $\beta$ -Elemene                            | 41.35    |
| 28 | 2-Ethyl-1,3-dimethyl-Benzene                | 42.26    |
| 29 | $\beta$ -Caryophyllene                      | 43.05    |
| 30 | $\delta$ -Elemene                           | 43.35    |
| 31 | Nerylacetone                                | 44.07    |
| 32 | $\alpha$ -Muurolene                         | 45.97    |
| 33 | Germacrene D                                | 46.17    |
| 34 | $\alpha$ -Selinene                          | 46.58    |
| 35 | Bicyclogermacrene                           | 46.86    |
| 36 | Geranyl isobutyrate                         | 47.02    |
| 37 | $\delta$ -Cadinene                          | 47.12    |
| 38 | Unknown (C <sub>15</sub> H <sub>24</sub> )  | 47.81    |
| 39 | Elemol                                      | 49.29    |
| 40 | Unknown (C <sub>15</sub> H <sub>24</sub> )  | 49.99    |
| 41 | Unknown (C <sub>15</sub> H <sub>26</sub> O) | 52.77    |
| 42 | $\beta$ -Maaliene                           | 53.19    |

|    |                                             |       |
|----|---------------------------------------------|-------|
| 43 | Unknown (C <sub>15</sub> H <sub>26</sub> O) | 53.60 |
| 44 | τ-Muurolol                                  | 54.01 |
| 45 | Unknown (C <sub>15</sub> H <sub>26</sub> O) | 54.08 |
| 46 | Heptadecane                                 | 55.05 |

---

**Table S3. Chemical composition of *Croton thurifer* Kunth essential oil.**

| N° | Chemical constituents                                    | Rt<br>(min) |
|----|----------------------------------------------------------|-------------|
| 1  | $\alpha$ -Thujene                                        | 15.19       |
| 2  | $\alpha$ -Pinene                                         | 15.64       |
| 3  | Sabinene                                                 | 17.74       |
| 4  | $\beta$ -Pinene                                          | 18.09       |
| 5  | Unknown (C <sub>10</sub> H <sub>16</sub> )               | 18.57       |
| 6  | $\alpha$ -Phellandrene                                   | 19.63       |
| 7  | Isopentyl isobutyrate                                    | 19.92       |
| 8  | p-Cymene                                                 | 20.64       |
| 9  | D-Limonene                                               | 20.93       |
| 10 | $\beta$ -Phellandrene                                    | 21.07       |
| 11 | Eucalyptol                                               | 21.16       |
| 12 | 1-methyl-4-(1-methylethyl)-1,4-cyclohexadiene            | 22.57       |
| 13 | Copaene                                                  | 40.68       |
| 14 | 1-ethenyl-1-methyl-2,4-bis (1-methylethenyl)-cyclohexane | 40.93       |
| 15 | $\beta$ -Elemene                                         | 41.39       |
| 16 | Cyperene                                                 | 42.28       |
| 17 | $\beta$ -Caryophyllene                                   | 43.08       |
| 18 | Unknown (C <sub>15</sub> H <sub>24</sub> )               | 44.16       |
| 19 | L-Alloaromadendrene                                      | 44.44       |
| 20 | $\alpha$ -Caryophyllene                                  | 44.89       |
| 21 | $\alpha$ -Elemene                                        | 45.77       |
| 22 | Unknown (C <sub>15</sub> H <sub>24</sub> )               | 45.88       |
| 23 | Unknown (C <sub>15</sub> H <sub>24</sub> )               | 46.04       |
| 24 | Germacrene D                                             | 46.21       |
| 25 | Eremophilene                                             | 46.61       |
| 26 | Unknown (C <sub>15</sub> H <sub>26</sub> O)              | 46.85       |
| 27 | Unknown (C <sub>15</sub> H <sub>26</sub> O)              | 47.59       |
| 28 | $\delta$ -Cadinene                                       | 47.83       |
| 29 | Unknown (C <sub>15</sub> H <sub>26</sub> O)              | 52.08       |
| 30 | Unknown (C <sub>15</sub> H <sub>22</sub> O)              | 52.93       |
| 31 | Unknown (C <sub>9</sub> H <sub>14</sub> O)               | 53.39       |
| 32 | Unknown (C <sub>15</sub> H <sub>26</sub> O)              | 53.70       |
| 33 | Unknown (C <sub>15</sub> H <sub>26</sub> O)              | 54.20       |
| 34 | Heptadecane                                              | 55.06       |



**Table S4. Chemical composition of *Croton collinus* Kunth essential oil.**

| N° | Chemical constituents                           | Rt<br>(min) |
|----|-------------------------------------------------|-------------|
| 1  | $\alpha$ -Thujene                               | 15.18       |
| 2  | $\alpha$ -Pinene                                | 15.64       |
| 3  | Sabinene                                        | 17.73       |
| 4  | $\beta$ -Pinene                                 | 18.08       |
| 5  | $\beta$ -Myrcene                                | 18.51       |
| 6  | $\alpha$ -Phellandrene                          | 19.61       |
| 7  | p-Cymene                                        | 20.64       |
| 8  | D-Limonene                                      | 20.96       |
| 9  | $\beta$ -Thujene                                | 21.10       |
| 10 | cis-Ocimene                                     | 21.75       |
| 11 | 1-methyl-4- (1-methylethyl) -1,4-cyclohexadiene | 22.57       |
| 12 | Terpinolene                                     | 24.16       |
| 13 | 2-Undecanone                                    | 35.87       |
| 14 | 1,5,5-Trimethyl-6-methylene-cyclohexene         | 38.25       |
| 15 | Copaene                                         | 40.68       |
| 16 | Unknown (C <sub>15</sub> H <sub>24</sub> )      | 40.93       |
| 17 | Unknown (C <sub>15</sub> H <sub>24</sub> )      | 41.13       |
| 18 | $\beta$ -Elemene                                | 41.35       |
| 19 | Cyperene                                        | 42.27       |
| 20 | $\beta$ -Caryophyllene                          | 43.18       |
| 21 | Geranyl acetone                                 | 44.07       |
| 22 | $\alpha$ -Caryophyllene                         | 44.91       |
| 23 | Aromadendrene                                   | 45.10       |
| 24 | Valencene                                       | 45.74       |
| 25 | $\alpha$ -Curcumene                             | 45.91       |
| 26 | Germacrene D                                    | 46.15       |
| 27 | $\alpha$ -Selinene                              | 46.57       |
| 28 | $\beta$ -Cubebene                               | 46.70       |
| 29 | Bicyclogermacrene                               | 46.87       |
| 30 | Unknown (C <sub>15</sub> H <sub>24</sub> )      | 47.31       |
| 31 | $\alpha$ -Muurolene                             | 47.65       |
| 32 | $\delta$ -Cadinene                              | 47.83       |
| 33 | (-)-Spatulenol                                  | 50.79       |
| 34 | Unknown (C <sub>15</sub> H <sub>24</sub> O)     | 51.12       |
| 35 | $\tau$ -Muurolene                               | 53.53       |
| 36 | $\tau$ -Muurolol                                | 53.60       |
| 37 | $\alpha$ -Cadinol                               | 54.01       |
| 38 | Heptadecane                                     | 55.05       |

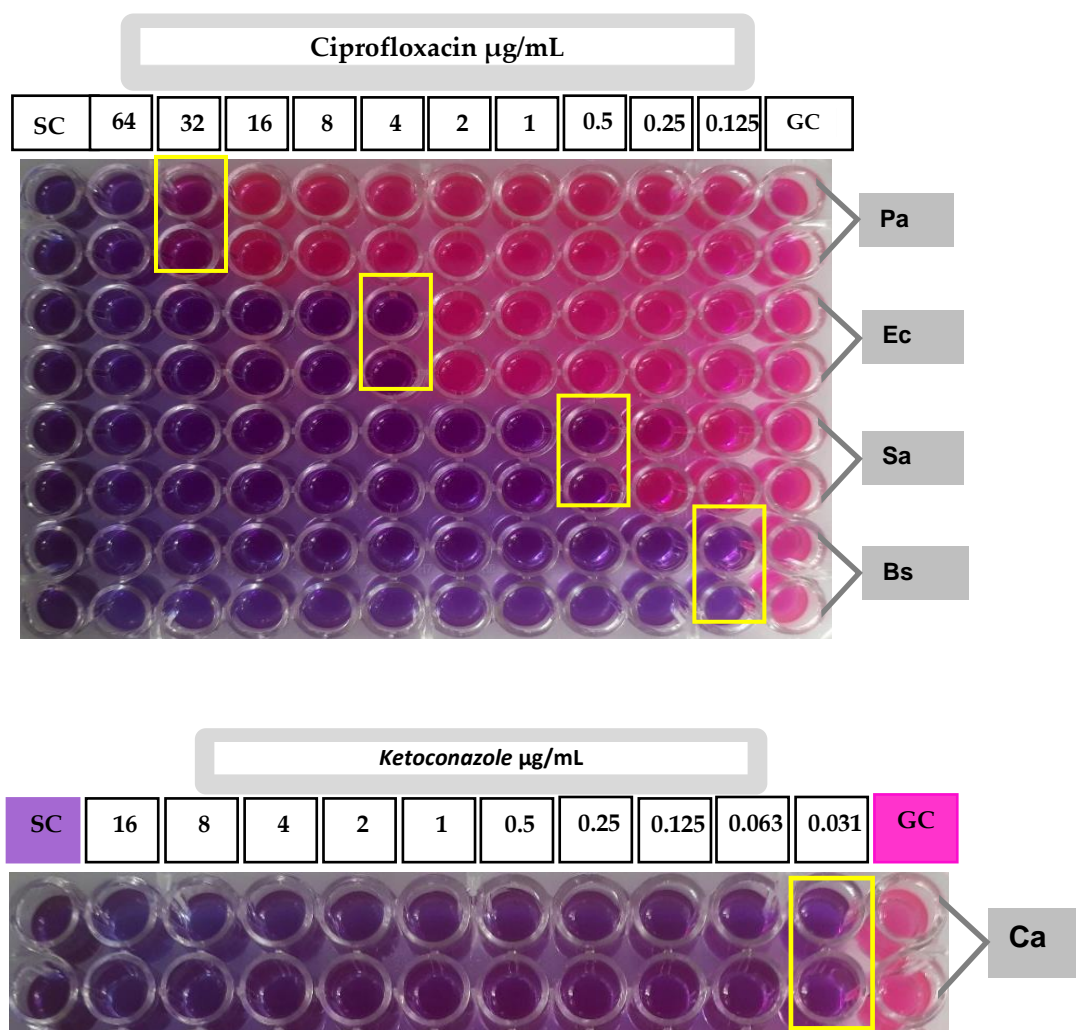

**Figure S7.** Determination of the Minimum Inhibitory Concentration of the standard drugs. SC (Sterility Control), GC (Growth Control), Sa (*S. aureus*), Bs (*B. subtilis*), Ec (*E. coli*), Pa (*P. aeruginosa*), Ca (*C. albicans*).
